# Supplementary material for: A fluorescence turn on trypsin assay based on aqueous polyfluorene
Source: Royal Society of Chemistry journal article supplement (doi:10.1039/c3tb20712a), 2013-01-01
Supplement: c3tb20712a.pdf [file c3tb20712a.pdf]

## Electronic Supplementary Information

# A Fluorescence Turn on Trypsin Assay Based on Aqueous Polyfluorene

*Atul K. Dwivedi and Parameswar K. Iyer\**

Department of Chemistry, Indian Institute of Technology Guwahati, Guwahati-781039. India

E-mail: [pki@iitg.ernet.in](mailto:pki@iitg.ernet.in)

FAX: +91-361-2582349

Phone: +91-361-2582314

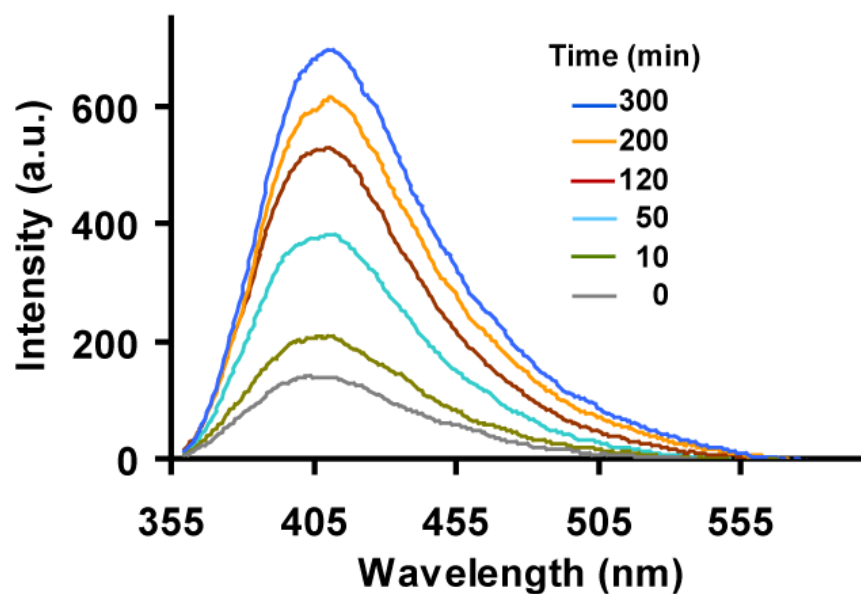

**Figure S1:** Changes in fluorescence intensity of P1 (0.4 μM)/Arg<sub>6</sub> (0-5 μM) in the presence of trypsin (40 nM) at pH 8.5 in 2mM PBS solution containing [Ca<sup>2+</sup>] = 10 μM, in prolonged time duration of upto 300 min.

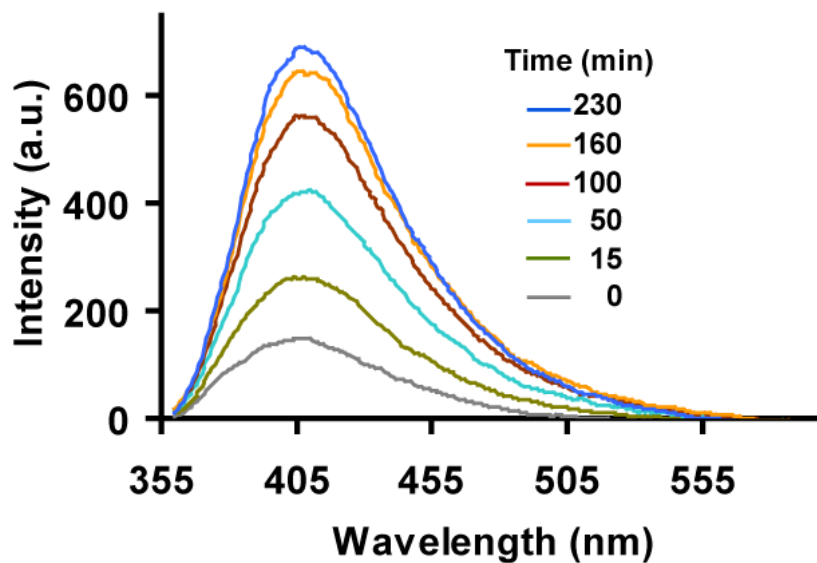

**Figure S2:** Changes in fluorescence intensity of P1 (0.4 μM)/Arg<sub>6</sub> (0-5 μM) in the presence of trypsin (80 nM) at pH 8.5 in 2mM PBS solution containing [Ca<sup>2+</sup>] = 10 μM, in prolonged time duration of upto 230 min.

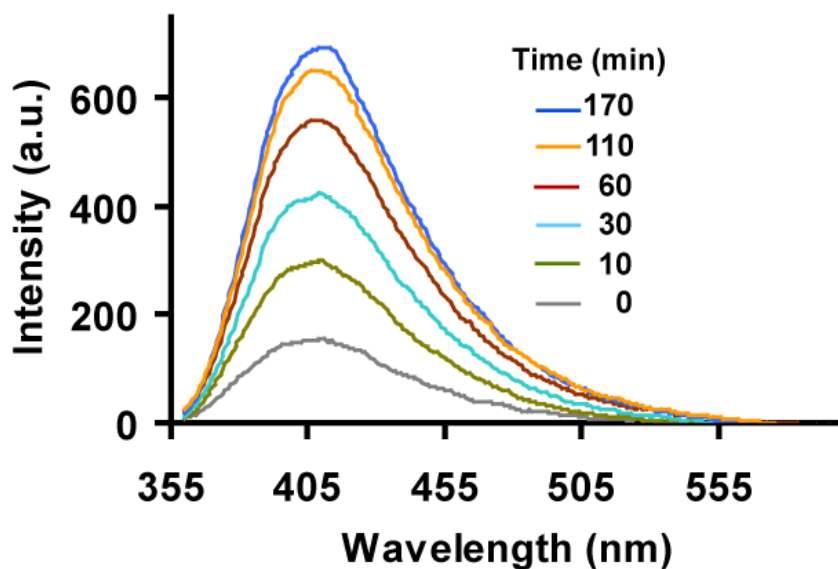

**Figure S3:** Changes in fluorescence intensity of P1 (0.4 μM)/Arg<sub>6</sub> (0-5 μM) in the presence of trypsin (120 nM) at pH 8.5 in 2mM PBS solution containing [Ca<sup>2+</sup>] = 10 μM, in prolonged time duration of upto 170 min.

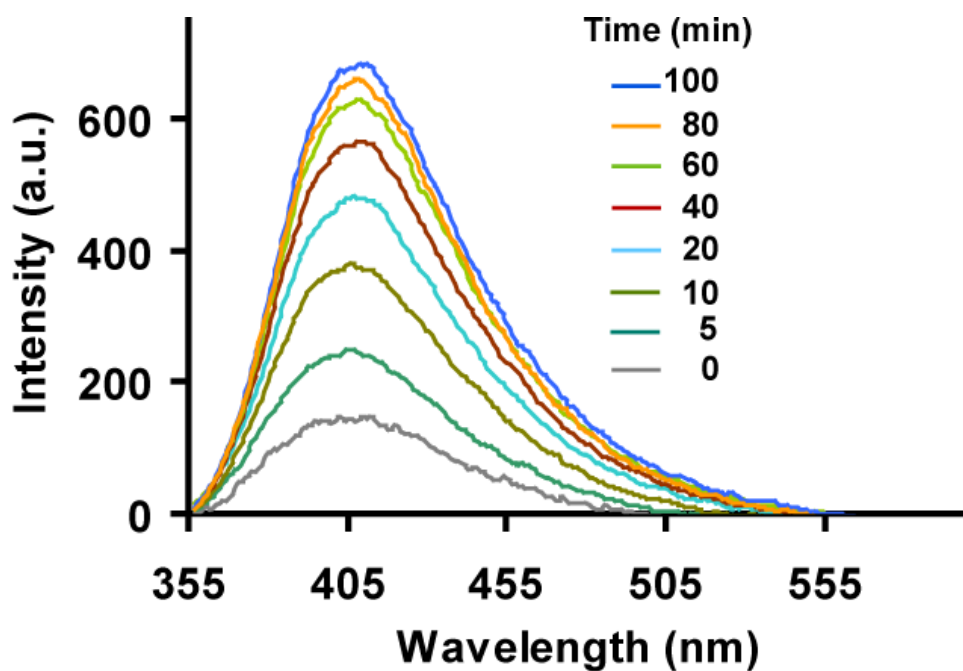

**Figure S4:** Changes in fluorescence intensity of P1 (0.4 μM)/Arg<sub>6</sub> (0-5 μM) in the presence of trypsin (180 nM) at pH 8.5 in 2mM PBS solution containing [Ca<sup>2+</sup>] = 10 μM, in prolonged time duration of upto 100 min.

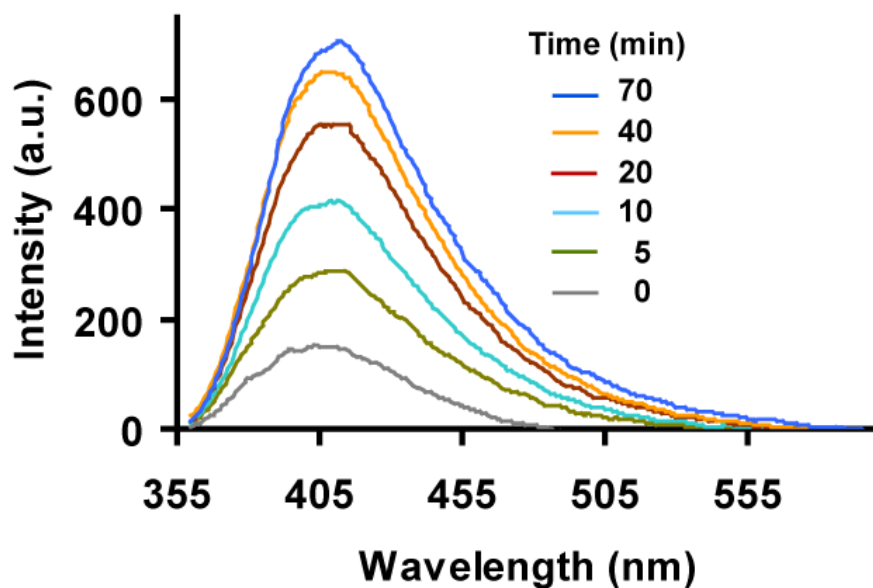

**Figure S5:** Changes in fluorescence intensity of P1 (0.4 μM)/Arg<sub>6</sub> (0-5 μM) in the presence of trypsin (220 nM) at pH 8.5 in 2 mM PBS solution containing [Ca<sup>2+</sup>] = 10 μM, in prolonged time duration of upto 70 min.

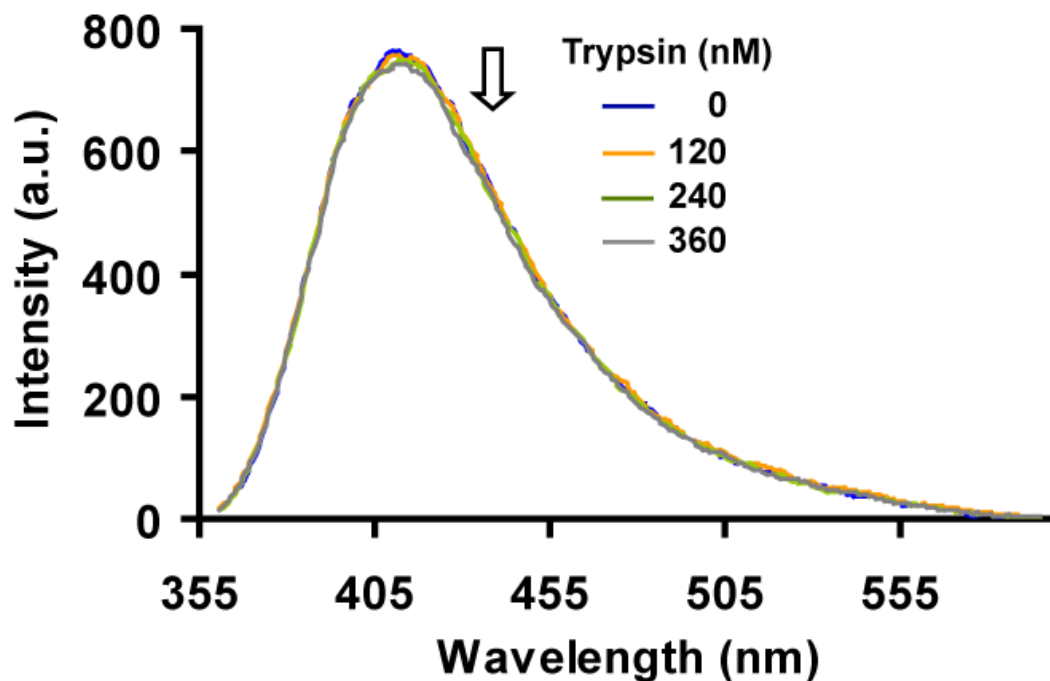

**Figure S6:** Changes in fluorescence intensity of P1 (0.4 μM) in presence of increasing concentration of trypsin from 0 to 360 nM at pH 8.5 in 2 mM PBS solution after 20 min.
